# Supplementary material for: S-Dimethylarsino-glutathione (darinaparsin®) targets histone H3.3, leading to TRAIL-induced apoptosis in leukemia cells
Source: Royal Society of Chemistry journal article supplement (doi:10.1039/c9cc07605k), 2019-01-01
Supplement: c9cc07605k1.pdf [file c9cc07605k1.pdf]

## Supplementary Information

### **S-dimethylarsino-glutathione (darinaparsin®) targets histone H3.3, leading to TRAIL-induced apoptosis in leukemia cells**

Xiaohan Xu,<sup>a†</sup> Haibo Wang,<sup>a†</sup> Hongyan Li,<sup>a</sup> Xuqiao Hu,<sup>a</sup> Yu Zhang,<sup>b</sup> Xinyuan Guan,<sup>b</sup>  
Patrick H Toy,<sup>a</sup> Hongzhe Sun<sup>\*a</sup>

<sup>a</sup> Department of Chemistry, The University of Hong Kong, Pokfulam Road, Hong Kong,  
P. R. China

<sup>b</sup> Department of Clinical Oncology, Li Ka Shing Faculty of Medicine, The University of  
Hong Kong, Sassoon Road, Hong Kong, P. R. China

† These authors contributed equally to this work

\* Corresponding author: Prof. Hongzhe Sun

E-mail: [hsun@hku.hk](mailto:hsun@hku.hk)

## Table of Contents

|                                                                                                                                                                 |    |
|-----------------------------------------------------------------------------------------------------------------------------------------------------------------|----|
| <b>Table of Contents</b> .....                                                                                                                                  | 2  |
| <b>Experimental Procedures</b> .....                                                                                                                            | 4  |
| Materials and Reagents .....                                                                                                                                    | 4  |
| Apparatus .....                                                                                                                                                 | 4  |
| Cell Culture and Fractionation .....                                                                                                                            | 4  |
| Identification of Arsenic Binding Protein in Cell Nuclei Fractions by GE-ICP-MS .....                                                                           | 5  |
| Arsenic Content Determination of histone H3.3 .....                                                                                                             | 6  |
| MALDI-TOF-MS .....                                                                                                                                              | 6  |
| Cellular Thermal Shift Assay (CETSA) .....                                                                                                                      | 6  |
| Ellman's Assay .....                                                                                                                                            | 7  |
| Modified SDS-PAGE .....                                                                                                                                         | 7  |
| Circular Dichroism Studies of Reconstituted Core Histones .....                                                                                                 | 7  |
| Thermal Denaturation of Reconstituted Nucleosomes .....                                                                                                         | 8  |
| Real-Time PCR .....                                                                                                                                             | 8  |
| Gene Knockdown .....                                                                                                                                            | 9  |
| Apoptosis Detection by Flow Cytometry .....                                                                                                                     | 9  |
| <b>Supplementary Figures and Tables</b> .....                                                                                                                   | 10 |
| Fig. S1. Cell viability of NB4 and HL60 cells under different concentrations of ZIO-101 and ATO. ....                                                           | 10 |
| Fig. S2. GE-ICP-MS analyses for the nuclei of NB4 cells treated with magnetic beads..                                                                           | 11 |
| Fig. S3. GE-ICP-MS analyses for the nuclei of PBMC cells treated with ZIO-101. ....                                                                             | 12 |
| Fig. S4. <i>In vitro</i> binding of ZIO-101 to histone H3.3 detected by GE-ICP-MS. ....                                                                         | 13 |
| Fig. S5. The binding stoichiometry of ZIO-101 to histone H3.3 measured by ICP-MS...14                                                                           |    |
| Fig. S6. Binding ratio between ATO and histone H3.3 analyzed by MALDI-TOF-MS. .15                                                                               |    |
| Fig. S7. Time-dependent <sup>75</sup> As GE-ICP-MS profiles of nuclear protein from NB4 and HL60 cells after treatment with ZIO-101. ....                       | 16 |
| Fig. S8. Cellular thermal shift assay (CETSA) of histone H3.3 in NB4 cells treated with ATO. ....                                                               | 17 |
| Fig. S9. Free cysteine detection. ....                                                                                                                          | 18 |
| Fig. S10. Disruption of histone H3.3 dimerization by the binding of ZIO-101. ....                                                                               | 19 |
| Fig. S11. Circular dichroism study regarding the effects of ZIO-101 binding to histone H3.3 on nucleosome structure. ....                                       | 20 |
| Fig. S12. Representative thermal denaturation ( <i>T<sub>m</sub></i> ) curves of nucleosomes formed by DNA and histones with or without ZIO-101 treatment. .... | 21 |
| Fig. S13. PPI (protein-protein interactions) of genes involved in transcriptional misregulation in cancers. ....                                                | 22 |
| Fig. S14. A heat map showing expression profiles of genes involved in transcriptional misregulation in cancers. ....                                            | 23 |
| Fig. S15. Flow cytometry plots for detecting apoptosis of NB4 cells after transfection study. ....                                                              | 24 |
| Table S1. Properties of Iodine-labelled standard proteins .....                                                                                                 | 25 |
| Table S2. Peptide mass fingerprints of histone H3.3 .....                                                                                                       | 26 |

|                                                                                                          |    |
|----------------------------------------------------------------------------------------------------------|----|
| Table S3. Information of the selected genes involved in ‘transcriptional misregulation in cancers’ ..... | 27 |
| Table S4. Primer sequences of the selected genes studied in RT-PCR (5’–3’).....                          | 29 |
| Table S5. Fold changes of apoptosis related genes in NB4 cells treated with ZIO-101. ...                 | 32 |
| <b>Supplementary Text</b> .....                                                                          | 33 |
| <b>References</b> .....                                                                                  | 34 |

## Experimental Procedures

### Materials and Reagents

NB4 cells and HL60 cells were provided by Dr. Eric Tse (Department of Medicine, the University of Hong Kong). Arsenic trioxide (purity,  $\geq 99.0\%$ ), Cell Proliferation Kit II (XTT), Multielement standard solution (51844) for ICP-MS detection of  $^{75}\text{As}$  and Amicon Ultra 0.5 mL centrifugal filters (3kDa MWCO, Millipore) were purchased from Sigma-Aldrich (St. Louis, MO, USA). ZIO-101 was bought from TRC Canada. RPMI1640 medium, fetal bovine serum (FBS) and penicillin-streptomycin solution were purchased from Life Technologies. Anti-histone H3.3 antibody and anti-rabbit IgG antibody were purchased from Abcam and Gene Company Limited (HK), respectively. Ultrapure Millipore (Mini-Q) water (18.2 M $\Omega$ ) was used throughout the experiments.

### Apparatus

The GE-ICP-MS system consisting a column-type gel electrophoresis for protein separation, ICP-MS (Agilent 7700x, Agilent Technologies, CA, USA) for elemental-specific analysis, and a peristaltic pump for transferring the eluents from the GE system to ICP-MS and the sample collection tubes was used in this work to identify arsenic-binding protein in cell nuclei fractions<sup>1</sup>.

### Cell Culture and Fractionation

NB4 and HL60 cells were cultured in RPMI1640 medium supplemented with 100  $\mu\text{g}/\text{mL}$  penicillin, 100  $\mu\text{g}/\text{mL}$  streptomycin and 10% heat-inactive FBS. Then, the cells were incubated in a 5%  $\text{CO}_2$  humidified incubator at  $37^\circ\text{C}$  and typically passaged with sub-cultivation ratio of 1:4 every two days. Cell viability of NB4 and HL60 cells were tested separately using 96 well plates with a gradient of ATO or ZIO-101 (0, 1, 5, 10, 50, 100  $\mu\text{M}$ ) for 7 hrs by an XTT cell proliferation assay. 200 mL of NB4/HL60 cells were treated with ATO/ZIO-101 at the  $\text{IC}_{50}$  concentration value for 7 hrs. Then the cells were harvested and washed with ice-cold phosphate-buffered saline (PBS of 1.9 mM  $\text{NaH}_2\text{PO}_4$ , 8.1 mM  $\text{Na}_2\text{HPO}_4$ , and 154 mM  $\text{NaCl}$  at pH 7.4) for three times. The cell pellets were re-suspended in 5 packed cell pellet volumes of hypotonic buffer A (10 mM HEPES, 10 mM  $\text{KCl}$ , 1.5 mM  $\text{MgCl}_2$ , pH 7.5) in the presence of a protease inhibitor cocktail (PIC) and placed on ice for 10 min. Subsequently, the cells were lysed by 10 stokes of a Kontes all-glass Dounce homogenizer that was washed with ultrapure water and then rinsed with buffer A. The homogenate was checked microscopically for cell lysis and centrifuged for 10 min at 3000g to pellet the nuclei. The nuclei pellets were washed with buffer A for three times and then buffer B (20 mM HEPES,

420 mM NaCl, 1.5 mM MgCl<sub>2</sub>, 25% glycerol, pH 7.5) containing PIC were added and the nuclei pellets were sonicated for 2 min. The supernatant containing nuclear proteins was collected by spinning at 20 000g for 30 min at 4°C. Protein concentrations were detected by bicinchoninic acid (BCA) assays (Novagen) and samples were snap frozen for further use<sup>2</sup>.

### **Identification of Arsenic Binding Protein in Cell Nuclei Fractions by GE-ICP-MS**

Generally, a reverse double layer SDS gel (15% → 13% with volumes of 140 µL and 120 µL, respectively) was used for separating NB4/HL60 nuclear proteins in GE-ICP-MS. A 4% SDS gel with the volume of 200 µL was casted on top as the stacking gel.

Approximately 50 µg samples were mixed with 1x loading buffer (0.5 M Tris-HCl buffer, pH 6.8, 25% glycerol (v/v)) and loaded onto the stacking gel. Gel electrophoresis was conducted under a consecutive two-step voltage program (60 min at 200 V and 600 V till the end) and the arsenic-binding protein was eluted in the last step. ICP-MS was run in the time-resolved analysis (TRA) mode (RF Power 1550 W, Sampling depth 7 mm) for monitoring arsenic signals associated with eluted protein fractions. A T-connection tubing was applied to split the elute from the gel electrophoresis separation, transferring half of the solution to ICP-MS and the other half to the sample collection tubes for protein identification. One-dimensional SDS-PAGE gels were subsequently used to separate the collected fractions, which also helped to concentrate the arsenic-binding proteins.

The iodine-labeled proteins<sup>3</sup> (Lysozyme, Carbonic anhydrase and Ovalbumin from GE Healthcare) were utilized to be protein markers during the GE-ICP-MS analyses. 1D SDS-PAGE gels with 15% gel were used to separate protein fractions collected in GE-ICP-MS. Protein samples with the same volume were analyzed using SDS-PAGE and then the gels were further silver-stained.

The proteins in gel pieces were extracted and identified through peptide mass fingerprinting according to the standard protocol. In detail, the proteins in gel pieces were extracted twice using 5% formic acid (FA)/50% acetonitrile (ACN) and then extracted once with 100% ACN. After purification by Ziptip (Millipore), the desalted peptides were mixed in a 1:1 ratio with 10 mg/ml  $\alpha$ -cyano-4-hydroxycinnamic acid matrix (Fluka) dissolved in 0.1% FA/50% ACN.

The samples were injected via a nanospray chamber equipped with a gold coated nanospray tip (New Objective). Protein identification and characterization were performed by using the 4800 MALDI TOF/TOF Analyser (ABSciex) which was equipped with a Nd:YAG laser that operates at 355 nm to ionize the samples. All mass spectra were acquired in positive ion reflector mode using the 4000 series explorer version 3.5.28193 software (ABSciex). Each sample was analyzed with

MALDI-TOF MS to create the peptide mass fingerprinting (PMF) data (scanning range of 900-4000 m/z). The peak detection criteria for MS/MS used were an S/N of 5 and a local noise window width of 250 (m/z) and a minimum full-width half maximum (bins) of 2.9. The combined PMF and MS/MS search was then performed using GPS Explorer algorithm version 3.6 (ABSciex) against the non-redundant NCBI database using the in-house MASCOT search engine version 2.2<sup>1</sup>. The criteria for protein identification were based on the probability score of each search result. Significant matches had scores greater than the minimum threshold set by MASCOT ( $P < 0.05$ ).

### **Arsenic Content Determination of histone H3.3**

The <sup>75</sup>As contents of histone H3.3 were determined by an Agilent 7700x inductively coupled plasma mass spectrometry (ICP-MS) spectrometer (Agilent Technologies, CA, USA) in a time-resolved analysis mode. The running conditions of ICP-MS were listed as follows: nebulizer (glass concentric), RF power (1550 W), Sampling depth (7.0 mm), Carrier gas (0.8 L/min), measurement duration (60 s). Each sample was quantified in triplicate and the average value was used. Histone H3.3 in Tris-HNO<sub>3</sub> buffer was incubated with ZIO-101 at the IC<sub>50</sub> value for 7 hrs at 4 °C, and then excess amounts of ZIO-101 were removed by ultrafiltration using Amicon Ultra 0.5 mL centrifugal filters (3 kDa MWCO). The protein concentration was measured by a BCA assay, and the bound arsenic was determined by ICP-MS. The standard curve of arsenic with concentration ranging from 1 ppb to 100 ppb was prepared from a multielement standard solution (90243, Sigma-Aldrich) for ICP-MS. Arsenic contents in proteins were calculated according to the standard curve.

### **MALDI-TOF-MS**

MALDI-TOF-MS was performed using the 4800 MALDI-TOF/TOF-MS (AB Sciex). 15 μM histone H3.3 (Sigma, H2542) in 20 mM Tris-HNO<sub>3</sub> buffer (pH 7.4) was incubated with ATO or ZIO-101, respectively at room temperature for 2hrs at varying molar ratios (histone H3.3: Arsenicals=1:0, 1:1, 1:2). Subsequently, 1 μL aliquot of each sample was mixed with 1 μL of 10 mg/mL Sinapinic acid matrix (Sigma) that had been dissolved in 0.1% TFA/50%ACN and the mixture was spotted onto the plate and dried before analysis. All mass spectra were acquired using the 4000 Series Explorer software (AB Sciex) under the positive ion linear mode with a laser intensity of 6000 and a delay time of 610 ns. Before the detection, the MS was calibrated using the CalMix#3 (AB Sciex; thionredoxin 11674Da and apomyoglobin 16952Da).

### **Cellular Thermal Shift Assay (CETSA)**

100 mL of NB4 cells ( $1.5$  to  $2 \times 10^6$  cells/mL) were treated with ATO/ZIO-101 under  $IC_{50}$  values for 7 hrs, and then harvested by centrifugation at 1000 g for 10 min at  $4^{\circ}C$ . Afterwards, the cells were re-suspended in 10 mL ice-cold PBS and washed three times under identical conditions. The cell pellets were collected and re-suspended in 1.5 mL ice-cold PBS. 100  $\mu$ L of the cell suspension was transferred into 0.2 mL PCR tubes, and each tube was heated in parallel in a PCR machine for 6 min to the respective temperature ( $50^{\circ}C$  to  $86^{\circ}C$ ). The tubes were then incubated for 6 min at room temperature. Subsequently, samples were frozen in liquid nitrogen for 3 min and then thawed in a  $25^{\circ}C$  water bath for 3 min. This freeze-thaw cycle was repeated five times. The entire content was centrifuged at 14,000 rpm for 20 min at  $4^{\circ}C$ . After centrifugation, 70  $\mu$ L of each supernatant was transferred into new tubes. The protein concentration of the  $50^{\circ}C$  sample was determined and used to normalize loading volume of SDS gels. Proteins in the supernatant were denatured using the SDS sample buffer, partially separated by means of SDS gel electrophoresis, and subjected to a western blot assay using H3.3 antibodies.

### **Ellman's assay**

According to previous report<sup>4</sup>, 100  $\mu$ M histone H3.3 (Sigma, H2542) was incubated with different molar equivalents of ZIO-101 at room temperature for 30 mins. Then excess amounts of 5,5'-Dithiobis-(2-nitrobenzoic acid) (DTNB) were added into samples to reach a final concentration of 300  $\mu$ M and further incubated for 20 mins. A Cary 50 UV-Vis spectrometer was used to record UV absorbance at 412 nm<sup>5</sup> for each sample and the data was plotted against the ZIO-101/protein ratio. The Ellman's assay was carried out in phosphate buffer (20 mM NaPO<sub>4</sub>, 0.3 M NaCl, pH=7.0).

### **Modified SDS-PAGE**

Modified SDS-PAGE was carried out in a mini vertical gel system. After dialyzed in different situations, histone H3.3 was diluted in loading buffer (0.2 M Tris-HCl buffer, pH 6.8, 20% glycerol (v/v)) and separated by 13% (m/v) acrylamide separating gel and 4% (m/v) stacking gel in Tris-glycine running buffer (25 mM Tris, 192 mM glycine, pH 8.3). The modified SDS-PAGE condition was 90 V for 15 min and 150 V for 1 h in an ice-water chamber. Then the gel was stained with Coomassie brilliant blue (CBB) R-250 to analyze the molecular weight of protein bands.

### **Circular Dichroism Studies of Reconstituted Core Histones**

A Jasco spectropolarimeter (model J-720) was utilized to perform circular dichroism (CD) measurements under a constant temperature of  $25^{\circ}C$ . Recombinant H3.3 core histone proteins

(SKU: 16-8012, EpiCypher, USA) were dissolved in 10 mM potassium phosphate, 100 mM KCl buffer (pH 7.4) to make a final concentration of 10  $\mu$ M, ZIO-101/ATO was prepared to a final concentration of 40  $\mu$ M. Control or arsenical-treated samples were placed in a 0.1 cm path-length quartz cuvette and the spectra were recorded from 190 to 280 nm and repeated three times. The scan speed and response time of CD spectra were settled to be 20 nm/min and 0.25s, respectively. Experiments were repeated three times to confirm repeatability of the results. CDNN7.0 software package was used to conduct the quantitative estimation of the contents of secondary structures.

### **Thermal Denaturation of Reconstituted Nucleosomes**

Recombinant H3.3 core histone proteins (SKU: 16-8012, EpiCypher, USA) and human DNA (Sigma) were utilized for the reconstitution of nucleosomes. Histones were treated with 1 mM ZIO-101 and then ultra-filtered using Amicon Ultra 0.5 mL centrifugal filters (3kDa MWCO). Subsequently, the reconstitution experiments were carried out according to previously reported protocol<sup>5</sup> by mixing histones and DNA at the ratio of 1:1. Thermal denaturation studies were conducted on a Varian Cary 50 spectrophotometer equipped with a single cell Peltier Accessory based on the reported procedures<sup>6</sup>. The melting point was calculated using the Savitsky-Golay algorithm<sup>7</sup>.

### **Real-Time PCR**

Real-time PCR to measure gene expression levels in NB4 cells was performed under the instruction of previous literature<sup>8</sup>. NB4 cells were seeded in P100 Petri dishes at  $2 \times 10^6$  and then cultured for 12 hrs at 37 °C in a humidified incubator containing 5% CO<sub>2</sub>. After that, cells were treated for 0, 6, 12 and 24 hrs with 5  $\mu$ M ZIO-101 and six biological replicates were prepared for each ZIO-101 treatment group with three of them being combined for total RNA extraction. Total RNA was extracted using RNA Extraction Kit (Takara, Japan) according to manufacturer's instructions with slight modifications and collected in 100  $\mu$ L RNase-free water and stored at -80 °C. A NanoDrop 1000 spectrophotometer was used to check RNA quality and to estimate RNA concentration. Reverse transcription was performed using PrimeScript™ RT Master Mix (Perfect Real Time, Takara, Japan) and obtained cDNA was used for Real-Time PCR. Real-Time PCR was conducted using TB Green™ Premix Ex Taq™ (Takara, Japan) and specific primers (sequences are listed in Table S3) on StepOnePlus Real-Time PCR system (Applied Biosystems, USA). cDNA for each sample and the non-template control were used in the detection of each target gene. The transcription level of target genes was quantified using  $\Delta\Delta$ Ct method<sup>9, 10</sup>. GAPDH was used as an internal control and expression of target genes was calculated relative to GAPDH expression.

### **Gene Knockdown**

The histone H3.3-specific siRNA and negative control siRNA were synthesized and purchased from Thermo Scientific. NB4 cells were plated in 12-well culture plates at the density of  $2 \times 10^5$  in 1 mL RPMI1640 medium without antibiotics one day before transfection and then transfected with siRNA using Lipofectamine™ 2000 reagent (Invitrogen). For each transfection sample, 20 pmol siRNA oligomer was diluted in 100  $\mu$ L Opti-MEMI reduced serum medium (Invitrogen). This mixture was mixed with 2  $\mu$ L Lipofectamine™ 2000 diluted in 100  $\mu$ L Opti-MEMI medium and then the mixture was incubated at room temperature for 20 mins. Subsequently, the siRNA-Lipofectamine™ 2000 complexes were gently added into cells. PRMI1640 medium containing antibiotics were added after NB4 cells were transfected for 6 hrs. The cells were harvested and lysed after 24 hrs and histone H3.3 was quantified using Western blotting assay<sup>11</sup>.

### **Apoptosis Detection by Flow Cytometry**

ZIO-101 induced apoptosis in NB4 cells before and after histone H3.3 silencing were detected using the Annexin V-FITC apoptosis detection kit (Thermo Scientific). NB4 cells were plated in 6-well culture plates at the density of  $1 \times 10^6$  in 2 mL RPMI 1640 medium. After silenced using negative control siRNA or histone H3.3-specific siRNA, NB4 cells were treated with 5  $\mu$ M ZIO-101 for 12 hrs. Then NB4 cells were harvested and washed 3 times using could 1xPBS. Samples were stained by Annexin V-FITC and propidium iodide (PI) according to the kit's protocol. After incubated in the dark for 15 mins at room temperature, the samples were analyzed by flow cytometry with FITC filters and PI filters. Data were processed using Flowjo software.

## Supplementary Figures and Tables

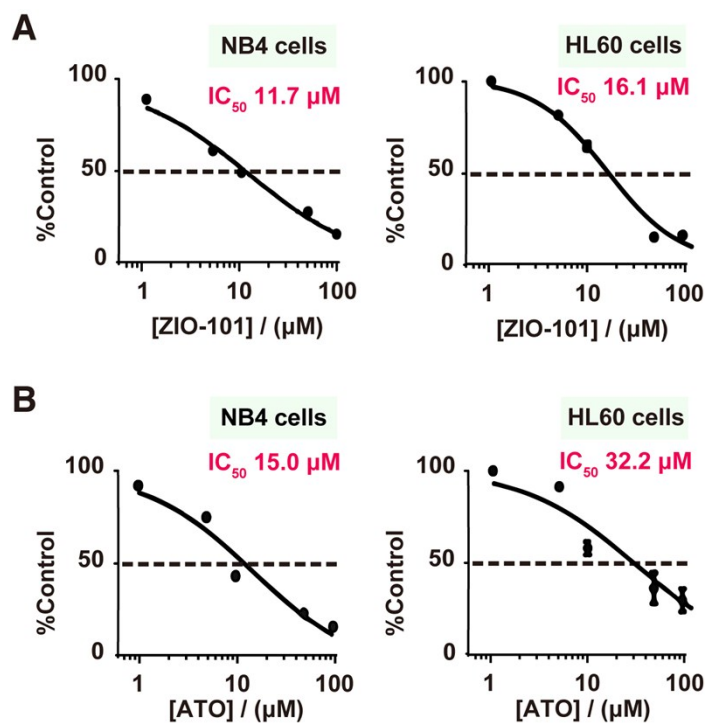

**Fig. S1.** Cell viability of NB4 and HL60 cells under different concentrations of ZIO-101 and ATO. (A) ZIO-101 treatment. (B) ATO treatment. The curves were plotted according to XTT cell proliferation assay.

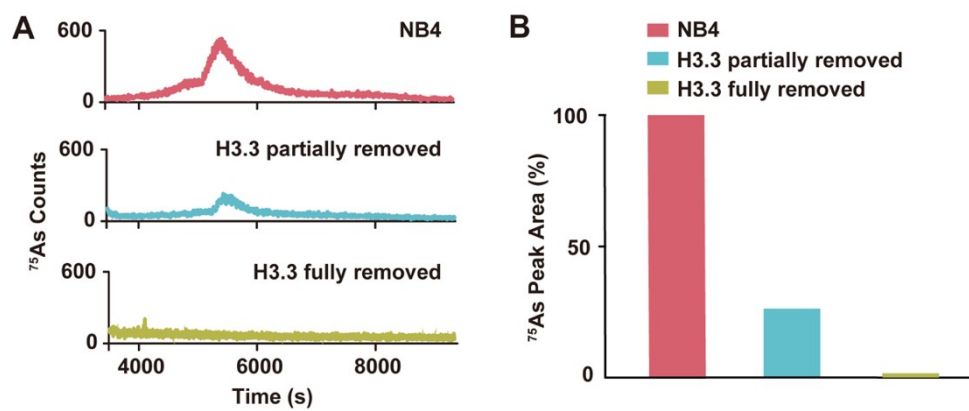

**Fig. S2.** GE-ICP-MS analyses for the nuclei of NB4 cells treated with magnetic beads. (A) GE-ICP-MS profiles of  $^{75}\text{As}$ . (B) Peak area of  $^{75}\text{As}$ .

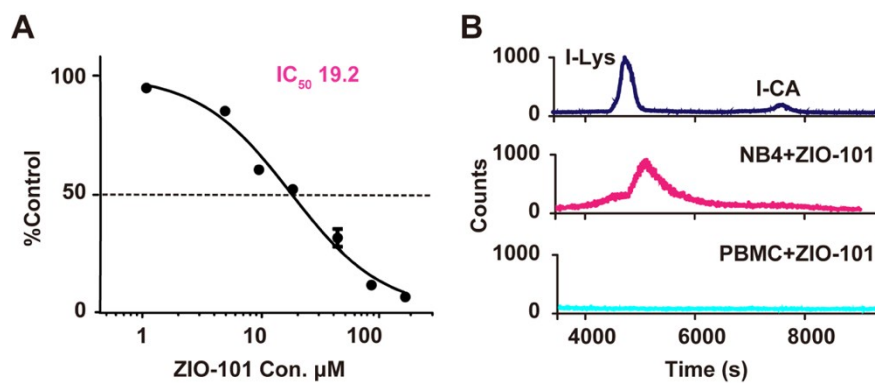

**Fig. S3.** GE-ICP-MS analyses for the nuclei of PBMC cells treated with ZIO-101. **(A)** Cell viability for PBMC cells under different concentrations of ZIO-101. The figures were plotted according to XTT cell proliferation assay. **(B)** GE-ICP-MS profiles of I-labeled standard proteins, arsenic-binding proteins in nuclei of ZIO-101 treated NB4 cells and PBMC cells.

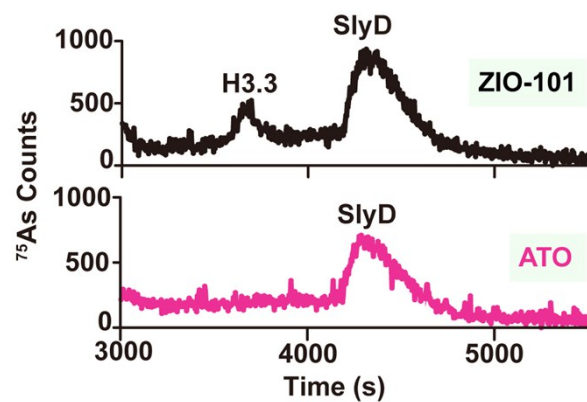

**Fig. S4.** *In vitro* binding of ZIO-101 to histone H3.3 detected by GE-ICP-MS. GE-ICP-MS profiles of <sup>75</sup>As in histone H3.3 and SlyD incubated with ZIO-101 (up) or ATO (down) for 12 hrs.

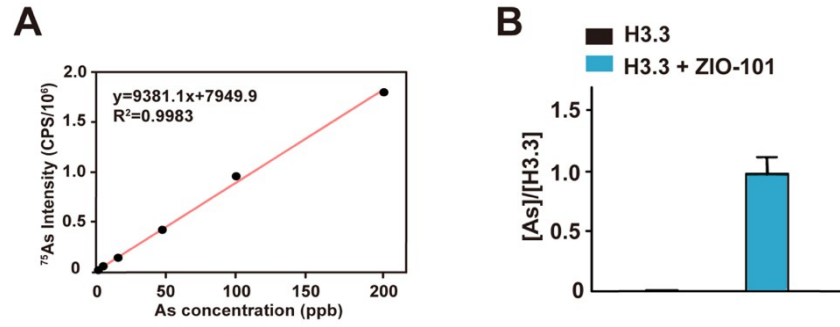

**Fig. S5.** The binding stoichiometry of ZIO-101 to histone H3.3 measured by ICP-MS. (A)  $^{75}\text{As}$  calibration curve using standard arsenic solution by ICP-MS. (B)  $^{75}\text{As}$ -binding capacity of histone H3.3. The arsenic contents were detected by ICP-MS and protein concentrations were measured by BCA assay.

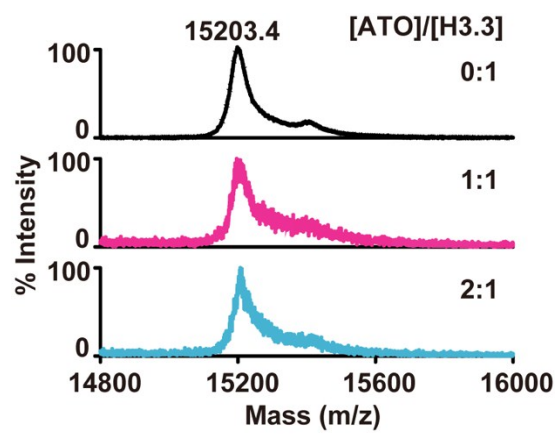

**Fig. S6. Binding ratio between ATO and histone H3.3 analyzed by MALDI-TOF-MS.**

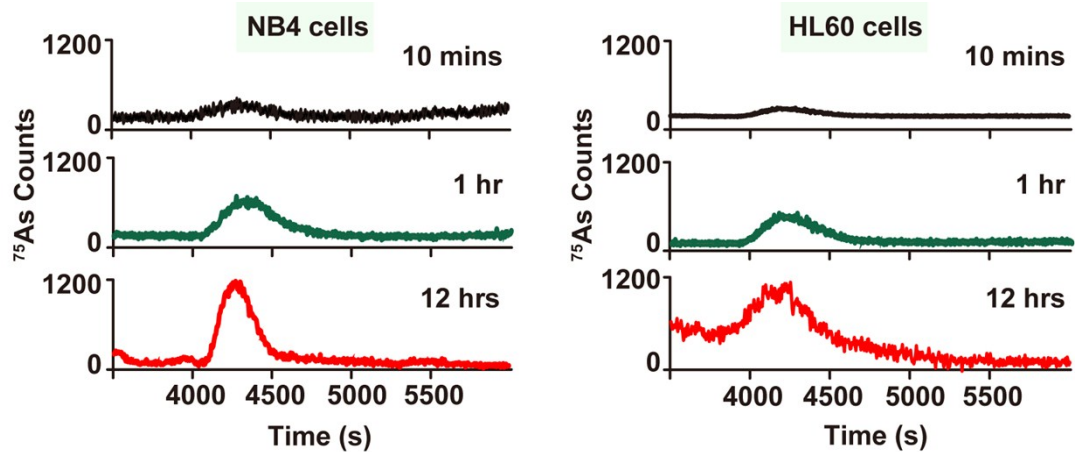

**Fig. S7.** Time-dependent  $^{75}\text{As}$  GE-ICP-MS profiles of nuclear protein from NB4 and HL60 cells after treatment with ZIO-101.

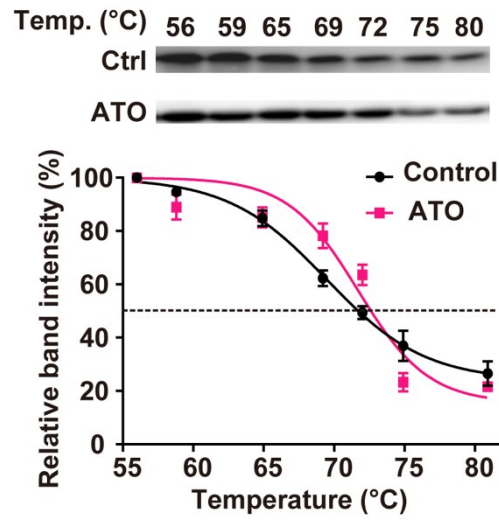

**Fig. S8. Cellular thermal shift assay (CETSA) of histone H3.3 in NB4 cells treated with ATO.** Each point plotted represents the mean of three replicates for each temperature; error bars denote  $\pm$  SD.

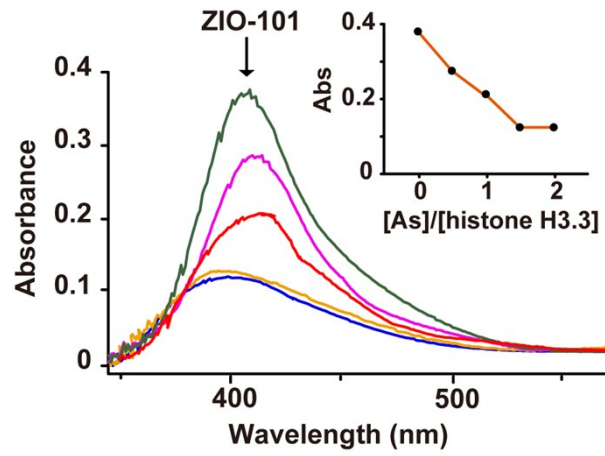

**Fig. S9.** Free cysteine detection. Changes of free cysteine contents before/after ZIO-101 incubation of histone H3.3 were monitored by Ellman's assay.

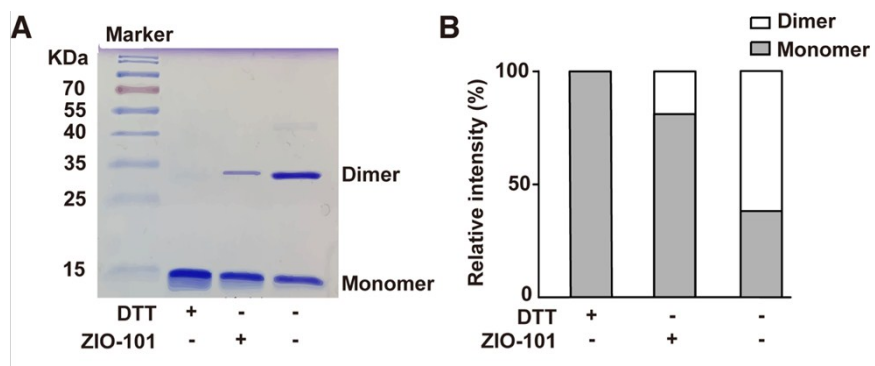

**Fig. S10. Disruption of histone H3.3 dimerization by the binding of ZIO-101. (A) Modified SDS-PAGE of histone H3.3 after dialysis in buffer containing ZIO-101 or DTT. (B) Relative band intensities of monomers and dimers in histone H3.3 under different dialysis conditions.**

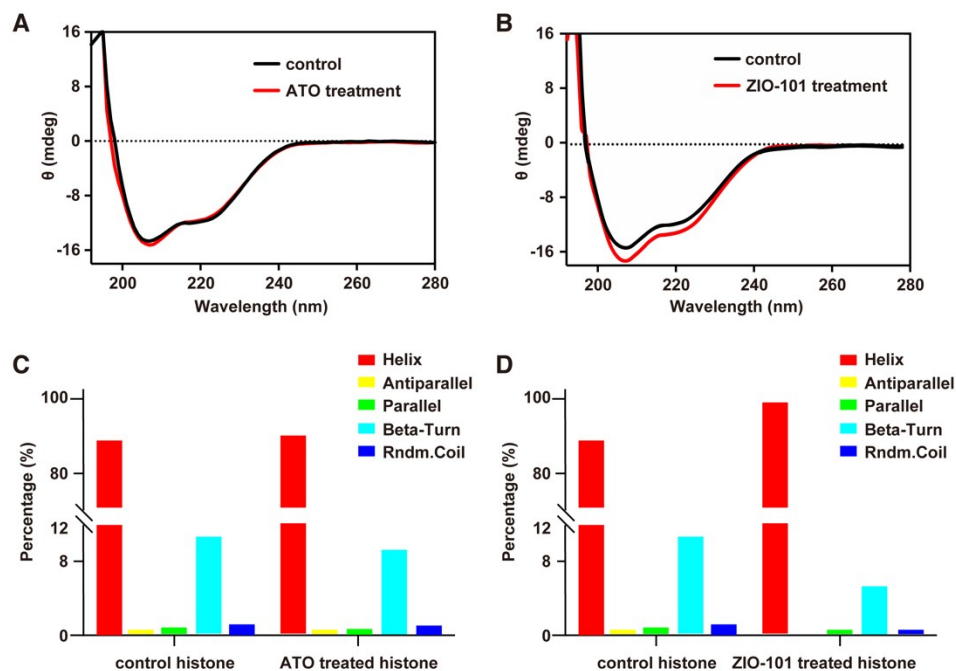

**Fig. S11. Circular dichroism study regarding the effects of ZIO-101 binding to histone H3.3 on nucleosome structure. (A)(B) Representative Circular Dichroism curves for control and ATO/ZIO-101 treated reconstituted nucleosomes. (C)(D) Quantitative estimation of the contents of secondary structures.**

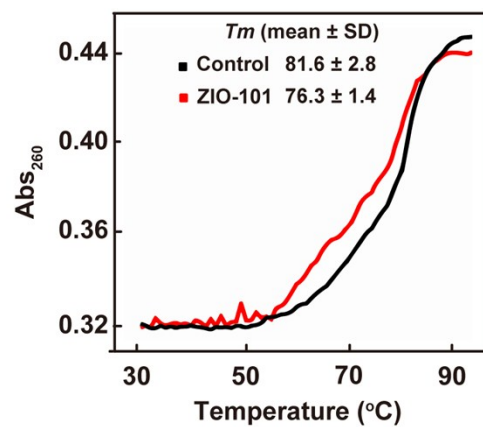

**Fig. S12.** Representative thermal denaturation ( $T_m$ ) curves of nucleosomes formed by DNA and histones with or without ZIO-101 treatment. *Inset:*  $T_m$  values obtained from three independent experiments (mean  $\pm$  SD).

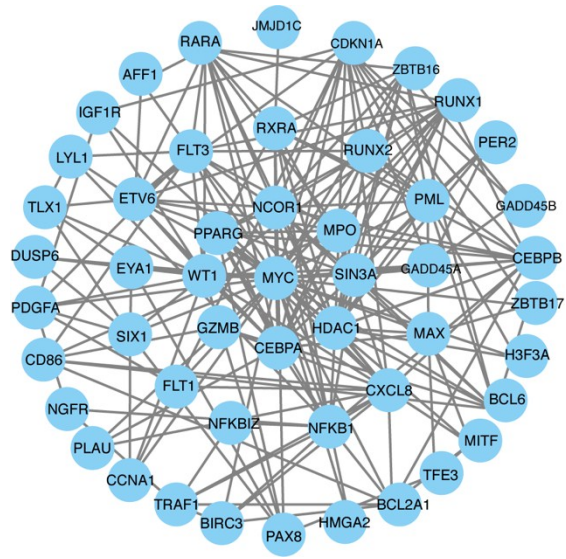

**Fig. S13. PPI (protein-protein interactions) of genes involved in transcriptional misregulation in cancers. The functional category is analyzed by STRING and viewed by Cytoscape.**

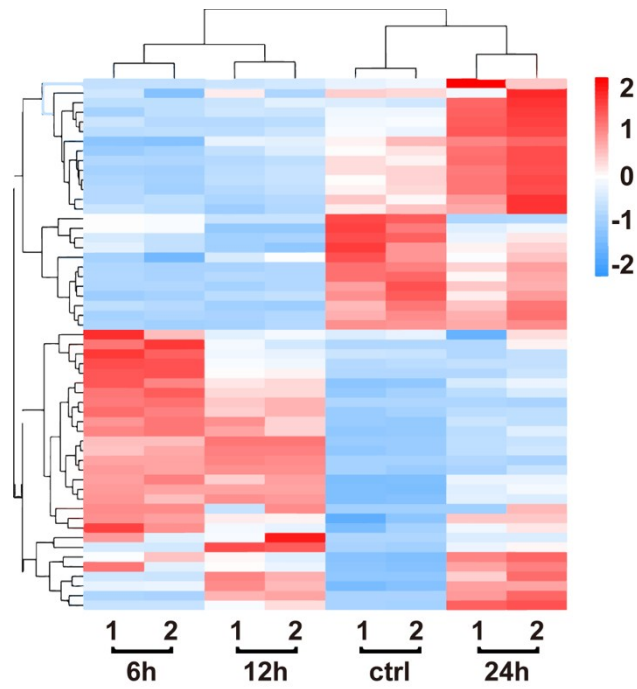

**Fig. S14.** A heat map showing expression profiles of genes involved in transcriptional misregulation in cancers.

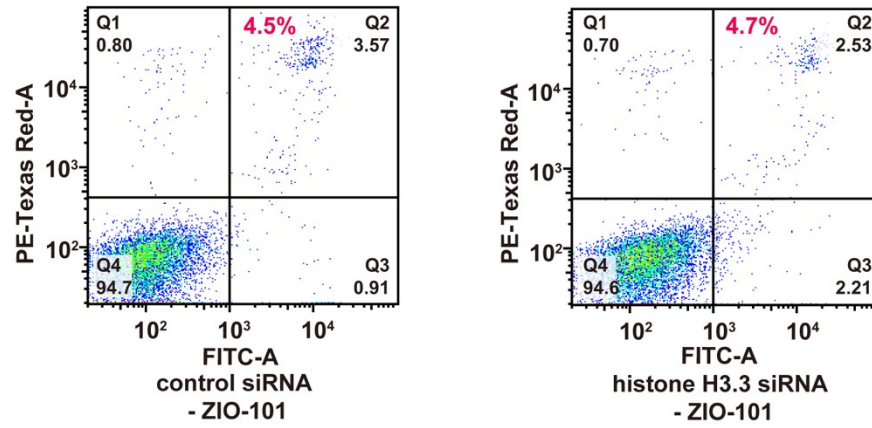

**Fig. S15. Flow cytometry plots for detecting apoptosis of NB4 cells after transfection study.**  
**(A)** NB4 cells were transfected with negative control siRNA. **(B)** NB4 cells were transfected with histone H3.3 siRNA.

**Table S1. Properties of Iodine-labelled standard proteins**

| <b>Proteins</b>               | <b>pI</b>   | <b>Theoretical molecular<br/>mass (kDa)</b> | <b>Calibrated molecular<br/>mass (kDa)</b> |
|-------------------------------|-------------|---------------------------------------------|--------------------------------------------|
| <b>Lysozyme</b>               | <b>10.5</b> | <b>14.4</b>                                 | <b>14.9</b>                                |
| <b>Carbonic<br/>anhydrase</b> | <b>6.2</b>  | <b>29.0</b>                                 | <b>30.1</b>                                |
| <b>Ovalbumin</b>              | <b>4.7</b>  | <b>44.0</b>                                 | <b>45.3</b>                                |

**Table S2. Peptide mass fingerprints of histone H3.3**

| <b>Protein Name</b>                    | <b>Accession No.</b> | <b>Protein Score</b>    | <b>Protein Score C.I.%</b> | <b>Molecular Mass</b> |
|----------------------------------------|----------------------|-------------------------|----------------------------|-----------------------|
| <b>histone H3.3<br/>[Homo sapiens]</b> | <b>AAH81561.1</b>    | <b>128</b>              | <b>100</b>                 | <b>15332.5</b>        |
| <b>Peptide Information</b>             |                      |                         |                            |                       |
| <b>Calc. Mass</b>                      | <b>Obs. Mass</b>     | <b>Peptide Sequence</b> | <b>Modification</b>        | <b>Ion Score</b>      |
| <b>990.5578</b>                        | <b>990.6066</b>      | <b>QTALKSTGGK</b>       |                            |                       |
| <b>1028.6364</b>                       | <b>1028.6772</b>     | <b>LPFQRLVR</b>         |                            |                       |
| <b>1032.595</b>                        | <b>1032.6504</b>     | <b>YRPGTVALR</b>        |                            |                       |
| <b>1032.595</b>                        | <b>1032.6504</b>     | <b>YRPGTVALR</b>        |                            | <b>19</b>             |
| <b>1218.6841</b>                       | <b>1218.746</b>      | <b>LVREIAQDFK</b>       |                            |                       |
| <b>1250.7103</b>                       | <b>1250.7753</b>     | <b>YQKSTELLIR</b>       |                            |                       |
| <b>1335.6903</b>                       | <b>1335.7584</b>     | <b>EIAQDFKTDLR</b>      |                            |                       |
| <b>1335.6903</b>                       | <b>1335.7584</b>     | <b>EIAQDFKTDLR</b>      |                            | <b>62</b>             |
| <b>1430.8226</b>                       | <b>1430.8873</b>     | <b>YRPGTVALREIR</b>     |                            |                       |

**Table S3. Information of the selected genes involved in ‘transcriptional misregulation in cancers’.**

| Gene Symbol | Gene Description                                                 |
|-------------|------------------------------------------------------------------|
| CXCL8       | Interleukin-8                                                    |
| BCL2A1      | Bcl-2-related protein A1                                         |
| GADD45A     | Growth arrest and DNA damage-inducible protein GADD45 alpha      |
| PLAU        | Urokinase-type plasminogen activator                             |
| CEBPA       | CCAAT/enhancer-binding protein alpha                             |
| TRAF1       | TNF receptor-associated factor 1                                 |
| WT1         | Wilms tumor protein                                              |
| NFKBIZ      | NF-kappa-B inhibitor zeta                                        |
| FLT1        | Vascular endothelial growth factor receptor 1                    |
| TFE3        | Transcription factor E3                                          |
| BCL6        | B-cell lymphoma 6 protein                                        |
| PDGFA       | Platelet-derived growth factor subunit A                         |
| ZBTB16      | Zinc finger and BTB domain-containing protein 16                 |
| H3F3A       | Histone H3.3                                                     |
| HDAC1       | Histone deacetylase 1                                            |
| PPARG       | Peroxisome proliferator-activated receptor gamma                 |
| BIRC3       | Baculoviral IAP repeat-containing protein 3                      |
| GADD45B     | Growth arrest and DNA damage-inducible protein GADD45 beta       |
| SIN3A       | Paired amphipathic helix protein Sin3a                           |
| CEBPB       | CCAAT/enhancer-binding protein beta                              |
| RXRA        | Retinoic acid receptor RXR-alpha                                 |
| ZBTB17      | Zinc finger and BTB domain-containing protein 17                 |
| IGF1R       | Insulin-like growth factor 1 receptor                            |
| LYL1        | Protein lyl-1                                                    |
| DUSP6       | Dual specificity protein phosphatase 6                           |
| JMJD1C      | Probable JmjC domain-containing histone demethylation protein 2C |

| Gene Symbol | Gene Description                                     |
|-------------|------------------------------------------------------|
| MPO         | Myeloperoxidase                                      |
| NFKB1       | Nuclear factor NF-kappa-B p105 subunit               |
| CDKN1A      | Cyclin-dependent kinase inhibitor 1                  |
| NCOR1       | Nuclear receptor corepressor 1                       |
| PER2        | Period circadian protein homolog 2                   |
| HMGA2       | High mobility group protein HMGI-C                   |
| PML         | Protein PML                                          |
| ETV6        | Transcription factor ETV6                            |
| RUNX1       | Runt-related transcription factor 1                  |
| MYC         | Myc proto-oncogene protein                           |
| FUT8        | Alpha-(1,6)-fucosyltransferase                       |
| PAX8        | Paired box protein Pax-8                             |
| MAX         | Protein max                                          |
| RUNX2       | Runt-related transcription factor 2                  |
| RARA        | Retinoic acid receptor alpha                         |
| GZMB        | Granzyme B                                           |
| CD86        | T-lymphocyte activation antigen CD86                 |
| AFF1        | AF4/FMR2 family member 1                             |
| SLC45A3     | Solute carrier family 45 member 3                    |
| CCNA1       | Cyclin-A1                                            |
| NGFR        | Tumor necrosis factor receptor superfamily member 16 |
| FLT3        | Receptor-type tyrosine-protein kinase FLT3           |
| BAK1        | Bcl-2 homologous antagonist/killer                   |
| ITGB7       | Integrin beta-7                                      |
| TLX1        | T-cell leukemia homeobox protein 1                   |
| SIX1        | Homeobox protein SIX1                                |
| EYA1        | Eyes absent homolog 1                                |
| ETV7        | Transcription factor ETV7                            |

**Table S4. Primer sequences of the selected genes studied in RT-PCR (5'–3').**

|           | <b>Forward Primers</b>         | <b>Reverse Primers</b>         |
|-----------|--------------------------------|--------------------------------|
| IRF1      | CTC TCA CCA AGA ACC AGA GAA A  | GAA GGT ATC AGG GCT GGA ATC    |
| BMF       | AGG TAC AGA TTG CCC GAA AG     | TGC CAC CAC ACA CGA TTT        |
| BBC3      | TGG AGG GTC CTG TAC AAT CT     | CAC CTA ATT GGG CTC CAT CTC    |
| BCL2L14   | GCC TTG CAG AAA TTC CCA ATC    | GCG AAT CTT CCT TCT CCA CTA C  |
| PMAIP1    | TGG AAG TCG AGT GTG CTA CT     | GTT CCT GAG CAG AAG AGT TTG G  |
| TNFRSF10B | CTG TTC TCT CTC AGG CAT CAT C  | GGA AGG ACT TTC TTC CAC AGT AA |
| TP53      | GGA AAT TTG CGT GTG GAG TAT TT | GTT GTA GTG GAT GGT GGT ACA G  |
| TNFSF10   | CAG AGA GTA GCA GCT CAC ATA AC | CCT TGA TGA TTC CCA GGA GTT T  |
| GAPDH     | GGT GTG AAC CAT GAG AAG TAT GA | GAG TCC TTC CAC GAT ACC AAA G  |
| H3F3A     | GCC TAT CTG GTT GGC CTT T      | CGT GCT AGC TGG ATG TCT TT     |
| HDAC1     | GCT GGC AAA GGC AAG TAT TAT G  | CTA GGC TGG AAC ATC TCC ATT AC |
| CDKN1A    | GAG CGA TGG AAC TTC GAC TT     | GCT TCC TCT TGG AGA AGA TCA G  |
| TRAF1     | AGT CTG TGC AAG AGC ATG AG     | GCC ATA CTT GGC AGT GTA GAA    |
| GADD45A   | AGA AGA CCG AAA GGA TGG ATA AG | GAT CAG GGT GAA GTG GAT CTG    |
| CASP9     | GTC GAA GCC AAC CCT AGA AA     | CAC CAA ATC CTC CAG AAC CA     |
| BCL2A1    | GTA GAC ACT GCC AGA ACA CTA TT | AAG TCA TCC AGC CAG ATT TAG G  |
| BIRC3     | CAA GCC AGT TAC CCT CAT CTA C  | CCT CAG TTG CTC TTT CTC TCT C  |
| PML       | AAG CCT TCT TCA GCA TCT ACT C  | GCT TGT AGC AGG CCA AGA TA     |
| CASP8     | GGA GCT GCT CTT CCG AAT TA     | CAT GAC CCT GTA GGC AGA AA     |
| CASP2     | CCT CAA CTT GCT GCC TAA GA     | AGG GTG GTG AGC AAC ATA TC     |
| CASP10    | GGA CAG ACA AGG AAC CCA TAA A  | TGC AGG ACC ATC TCC ATT TC     |
| GZMB      | CCA GCA GTT TAT CCC TGT GAA    | CCT CTT GTA GTG TGT GTG AGT G  |
| BCL2L11   | CAG ATA TGC GCC CAG AGA TAT G  | GTC TTC GGC TGC TTG GTA AT     |
| BAX       | TTC TGA CGG CAA CTT CAA CT     | CAG CCC ATG ATG GTT CTG AT     |
| CASP3     | CTC CAC AGC ACC TGG TTA TT     | AAA TTC AAG CTT GTC GGC ATA C  |
| CASP7     | CTG ACT TCC TCT TCG CCT ATT C  | TCT GCA TGA TTT CCA GGT CTT    |
| JUN       | AGA TGG AAA CGA CCT TCT ATG AC | CCG TTG CTG GAC TGG ATT AT     |

|         | <b>Forward Primers</b>         | <b>Reverse Primers</b>         |
|---------|--------------------------------|--------------------------------|
| CXCL8   | TTG GCA GCC TTC CTG ATT T      | AAA CTT CTC CAC AAC CCT CTG    |
| PLAU    | GAG GGC AGC ACT GTG AAA TA     | CCG GAT AGA GAT AGT CGG TAG AA |
| CEBPA   | CAT CGA CAT CAG CGC CTA C      | GTT CTT GTC CAC CGA CTT CTT    |
| WT1     | CGG AGC CCA ATA CAG AAT ACA    | GAG CTG GTC TGA ACG AGA AA     |
| NFKBIZ  | GGG CTC CCA ACA AAT GAT AGA    | GAG GAA GTC TGC ATG GGA TTA G  |
| FLT1    | CGT GTG GTC TTA CGG AGT ATT G  | GAG AAG GCA GGA GTT GAG TAT G  |
| TFE3    | CGG GAT TGT TGC TGA CAT AGA    | TCA CTG GAC TTA GGG ATG AGA G  |
| BCL6    | CTC AAC AGC CTC AAC CAG AA     | CCA CAG ATT TCA CAG GGA TAG G  |
| PDGFA   | CGT AGG GAC TGA GGA TTC TTT G  | TGG CTT CTT CCT GAC GTA TTC    |
| ZBTB16  | CCC TTC AGT CTC CAC TTC ATT T  | TTC TCA GCC GCA AAC TAT CC     |
| PPARG   | GCC TGC ATC TCC ACC TTA TT     | AGC GGG AAG GAC TTT ATG TAT G  |
| GADD45B | GTC GGC CAA GTT GAT GAA TG     | GCG TTC CTG AAG AGA GAT GTA G  |
| SIN3A   | CTG CTG GAT GGC AAC ATA GA     | CTG GCC TTG GCT CTG AAT AA     |
| CEBPB   | TTC CTC TCC GAC CTC TTC TC     | GCT TGT CCA CGG TCT TCT T      |
| RXRA    | CCT CTT TAA CCC TGA CTC CAA G  | GCC TCC AGC ATC TCC ATA AG     |
| ZBTB17  | GGT GGA CGG TGT TCA CTT TA     | CTT CTC CTC TTT GGC TCT CTT G  |
| IGF1R   | GCA GAG TGG ATA ACA AGG AGA G  | GAG CGA TGA TCA GAT GGA TGA A  |
| LYL1    | CAT GAC TGA GAA GGC AGA GAT G  | GCT GCT AGG GAA GAT GCT AAA    |
| DUSP6   | CAT TGC TTG GCT GGC ATT AG     | AGA GAG TCC ACC TGG TAT ACA T  |
| JMJD1C  | GGA CGA CAT AGA CAG CCT AAA C  | GAC CTG CGT CGT GAT GTA AT     |
| MPO     | CCA TGC ACA CCC TCT TAC TT     | CAT CAG TTT CCT CGC CAA TTT C  |
| NFKB1   | CAC CCT GAC CTT GCC TAT TT     | GAA CTC CAG CAC TCT CTT CTT T  |
| NCOR1   | CGG CAG AGA CAA GAA CAG ATA G  | TGG CAG TCC AAG AGA GAT AGA    |
| PER2    | GGA GTT AGA GAT GGT GGA AGA TG | CTC AGA TGA GTC TCG AGG TTT G  |
| HMGA2   | AGG AAG CAG CAG CAA GAA        | GAC TCT TGT GAG GAT GTC TCT TC |
| ETV6    | ACC AAA GAG GAC TTT CGC TAT C  | TTC AAT GGT GGG AGG GTT ATG    |
| RUNX1   | CAC TCT GAC CAT CAC TGT CTT C  | TGG TTG GAT CTG CCT TGT ATC    |

|         | <b>Forward Primers</b>         | <b>Reverse Primers</b>         |
|---------|--------------------------------|--------------------------------|
| MYC     | CTG AGG AGG AAC AAG AAG ATG AG | CTT GGA CGG ACA GGA TGT ATG    |
| FUT8    | ACT GGT TCA GCG GAG AAT AAC    | CTG GTA CAG CCA AGG GTA AAT    |
| PAX8    | CAC TCA CCC TTC GCC ATA AA     | CCA TAG GCA TTG CCA GAG TAT    |
| MAX     | AAC GTA GGG ACC ACA TCA AAG    | GTT GGT GTA GAG GCT GTT GT     |
| RUNX2   | CAC TAT CCA GCC ACC TTT ACT T  | AGC GTC AAC ACC ATC ATT CT     |
| RARA    | GAG CAG CAG TTC TGA AGA GAT AG | TGC TTC GCA GGT CAG TAA TC     |
| CD86    | GCC TGA GTG AGC TAG TAG TAT TT | GGT TCT GGG TAA CCG TGT ATA G  |
| AFF1    | TCC CAA GCA GAG AAG AGT AGA G  | CAA AGG TCA AAG GCG GTA AGA    |
| SLC45A3 | CAG GTG TTC CTG CCC AAA TA     | CTG GAC AAT GGA GCC CAT AAA    |
| CCNA1   | CTC CTC TCC CAG TCT GAA GAT A  | GGA AGT TGA CAG CCA GAT ACA    |
| NGFR    | GAC AAC CTC ATC CCT GTC TAT T  | CCT CAT GGG TAA AGG AGT CTA TG |
| FLT3    | CAA GAA ACG ACA CCG GAT ACT    | TTC CAG GTC CAA GAT GGT AAT G  |
| BAK1    | ACC CAG AGA TGG TCA CCT TA     | AAC AGA ACC ACA CCC AGA AC     |
| ITGB7   | CGG TGA CTT TCT GGG TTT CT     | CTC CTT CTC AAA GCG ACT GTA T  |
| TLX1    | GGC TCC TAC AAC GTG AAC AT     | ACC TGT GAA CCT GTC CTT TG     |
| SIX1    | TGC CGT CGT TTG GCT TTA        | GCT TGT TGG AGG AGG AGT TAT T  |
| EYA1    | CTC ACC GTA TCC AGC ACA TTA T  | CTA ACC CAT ACA GCA GGA CTT T  |
| ETV7    | CTG CTC CTT GAT ACC CGA TAT G  | CCA TCT TTC CCG GAG TCT TTA G  |
| MITF    | GAG TCA GAC ACC AGC CAT AAA    | GAG ACC CGT GGA TGG AAT AAG    |

**Table S5. Fold changes of apoptosis related genes in NB4 cells treated with ZIO-101.**

| Gene Symbol | Gene Description          | Fold Changes (6, 12, 24 hrs) |
|-------------|---------------------------|------------------------------|
| CASP3       | Caspase-3                 | 1.2, 1.9, 1.5                |
| CASP8       | Caspase-8                 | 1.1, 1.7, 2.7                |
| CASP9       | Caspase-9                 | 1.4, 1.9, 3.4                |
| BAX         | Apoptosis regulator BAX   | 1.2, 1.8, 2.6                |
| BMF         | Bcl-2-modifying factor    | 1.1, 4.3, 24.6               |
| BBC3        | Bcl-2-binding component 3 | 6.7, 7.5, 5.2                |
| BCL2L11     | Bcl-2-like protein 11     | 1.3, 3.0, 2.6                |

## Supplementary Text

To investigate whether the binding of ZIO-101 to cysteine could affect the formation of histone H3.3 dimers through inter-molecule disulfide bonds, histone H3.3 was dialyzed in buffer containing ZIO-101 or DTT and then analyzed by modified SDS-PAGE. As shown in Fig. S10 (ESI<sup>†</sup>), the binding of ZIO-101 to histone H3.3 prevents the dimerization of histone H3.3.

The effect of binding of ZIO-101 to histone H3.3 on the nucleosome structure were studied. The secondary structures of recombinant H3.3 core histone proteins (SKU: 16-8012, EpiCypher) with or without arsenic treatments were examined by circular dichroism spectroscopy. Two characteristic bands at 222 and 208 nm, representing  $\alpha$ -helical contents, were observed in histone cores in the absence of ZIO-101 and  $\alpha$ -helical contents increased upon ZIO-101 treatment (Fig. S11, ESI<sup>†</sup>), implying that the secondary structure of the nucleosome changed after treatment with ZIO-101.

To further examine whether the secondary structure rearrangement of histone cores owing to the binding of ZIO-101 could affect the stability of nucleosomes, the nucleosome thermal denaturation process was monitored by measuring the absorbance at 260 nm (Fig. S12, ESI<sup>†</sup>). Using nucleosomes containing untreated histone H3.3 as a control, a fusion temperature ( $T_m$ ) was determined to be  $81.6 \pm 2.8$  °C. A decrease in the DNA melting temperature to  $76.3 \pm 1.4$  °C was observed for nucleosomes consisting of ZIO-101 treated histone H3.3, showing that the nucleosome stability was disrupted. Our combined data clearly demonstrate that binding of ZIO-101 to histone H3.3 facilitates the denaturation of nucleosomes.

## References

1. L. Hu, T. Cheng, B. He, L. Li, Y. Wang, Y. Lai, G. Jiang and H. Sun, *Angew. Chem. Int. Ed.*, 2013, **125**, 5016-5020.
2. S. Komatsu, *Methods Mol. Biol.*, 2007, **355**, 73-77.
3. N. Jakubowski, J. Messerschmidt, M. Añorbe, L. Waentig, H. Hayena and P. Roosb, *J. Anal. At. Spectrom.*, 2008, **23**, 1487-1496.
4. L. Zhong, E. Arner and A. Holmgren, *Proc. Natl. Acad. Sci. U S A.*, 2000, **97**, 5854-5859.
5. K. Tatchell and K. Holde, *Biochemistry*, 1977, **16**, 5295-5303.
6. P. Lewis and S. Chiu, *Eur. J. Biochem.*, 1980, **109**, 369-376.
7. J. García-Giménez, G. Òlaso and S. Hake, *Antioxid. Redox Signal.*, 2012, **19**, 1305-1320.
8. S. A. Bustin, V. Benes, J. A. Garson, J. Hellemans, J. Huggett, M. Kubista, *Clin. Chem.*, 2009, **55**, 611-622.
9. Y. Lai, Z. Xu and Y. A., *Environ. Microbiol.*, 2017, **19**, 598-610.
10. J. M. Hearn, I. Romero-Canelónb, A. F. Munro, Y. Fu, P. J. Sadler, *Proc. Natl. Acad. Sci. U S A.*, 2015, **112**, E3800-3805.
11. L. Guan, B. Han, J. Li, Z. Li, F. Huang, Y. Yang and C. Xu, *Ann. Hematol.*, 2009, **88**, 733-742.
